# Supplementary material for: Exploring activity levels in physical education lessons in the UK: a cross-sectional examination of activity types and fitness levels
Source: HighWire-hosted journal article supplement (doi:10.1136/bmjsem-2020-000924), 2021-03-01
Supplement: bmjsem-2020-000924supp003_data_supplement.pdf [file bmjsem-2020-000924supp003_data_supplement.pdf]

Exploring activity levels in physical education lessons in the UK: A cross-sectional examination of activity types and fitness levels

**SUPPLEMENTARY FILE 3: The Brain Imaging Sub-study**

“The Effects of an In-school Physical Activity Intervention on Adolescents' Brain Structure and Function”

Physical activity has shown beneficial effects for cognitive and brain health, suggesting it might provide a highly scalable intervention to improve academic achievement. The sub-study was part of a large-scale randomised controlled trial called ‘Fit to Study’ (ClinicalTrials.gov ID: NCT03286725). The main ‘Fit to Study’ trial aimed to test the effect of a school-based physical activity intervention on academic performance (as well as cognition and physical measures) across Year8 pupils in 100 secondary schools. The ‘Brain Imaging Sub-study’ targeted a sub-sample of participants in the large-scale trial, in order to test pre- to post intervention changes in hippocampal volume, as well as cognitive performance, mental health, brain organisation and cardiorespiratory fitness.

**Table:** Demographic Data for Schools/Pupils that participated in the Brain imaging sub-study

|                                 |           | Sub-study Fitness Dataset |              |              |
|---------------------------------|-----------|---------------------------|--------------|--------------|
|                                 |           | Male                      | Female       | Total        |
| School Type<br>(Pupil data)     | Co-Ed     | 30                        | 29           | 59           |
|                                 | Female    | 0                         | 1            | 1            |
|                                 | Male      | 0                         | 0            | 0            |
|                                 | Total     | 30                        | 30           | *60          |
| Free School Meals Eligible      | No        | 29                        | 30           | 59           |
|                                 | Yes       | 1                         | 0            | 1            |
| Age, Years (as at 1 Sept. 2017) | Mean (SD) | 12.42 (0.28)              | 12.56 (0.45) | 12.49 (0.38) |
|                                 | Min-Max   | 12.05-12.95               | 12.01-14.52  | 12.01-14.52  |
| Height (cm)                     | Mean (SD) | 153.3 (5.6)               | 155.3 (7.0)  | 154.3 (6.4)  |
|                                 | Min-Max   | 142.0-164.0               | 140.0-166.0  | 140.0-166.0  |
| Weight (kg)                     | Mean (SD) | 46.1 (11.4)               | 46.6 (9.3)   | 46.4 (10.3)  |
|                                 | Min-Max   | 31.0-76.0                 | 30.9-70.0    | 30.9-76.0    |
| BMI (kgm-2)                     | Mean (SD) | 19.65 (4.42)              | 19.09 (3.06) | 19.38 (3.80) |
|                                 | Min-Max   | 14.01-32.05               | 15.77-26.35  | 14.01-32.05  |
| BMI z-score<br>(entire sample)  | Mean (SD) | ,04 (1.17)                | -,04 (.81)   | ,00 (1.00)   |
|                                 | Min-Max   | -1.41-3.33                | -,95-1.83    | -1.41-3.33   |
| MAP (mmHg)                      | Mean (SD) | 82.8 (7.1)                | 84.2 (8.2)   | 83.5 (7.6)   |
|                                 | Min-Max   | 71.3-98.3                 | 63.0-102.0   | 63.0-102.0   |

**Notes**

\* 60 pupils from across 10 schools

Exploring activity levels in physical education lessons in the UK: A cross-sectional examination of activity types and fitness levels

**Table:** VO2Max results from cardiopulmonary exercise tests (CPETs)

| p = 0.018                 | Male<br>(n=30) | Female<br>(n=30) | Overall<br>(n=60) |
|---------------------------|----------------|------------------|-------------------|
| <b>VO2Max (ml/min/kg)</b> |                |                  |                   |
| Mean (SD)                 | 39.9 (9.41)    | 35.0 (6.09)      | 37.5 (8.25)       |

**Reliability of fitness measure. Concurrent validity testing from CPET**

To validate the shuttle run test, a sub-set of pupils (who were participating in a Brain Imaging Sub-study) undertook a cardiopulmonary exercise test to determine their maximal aerobic capacity. This involved a graded test[1, 2] on a cycle ergometer (Lode Excalibur Sport, Groningen, NL). The maximal oxygen uptake (VO2Max) per kilogram was the main dependent variable.

A Bland Altman plot of sub-study pupil fitness (VO2Max) and estimated VO2Max, calculated from the main study fitness data (shuttle run score) using the Leger conversion equation[3] was undertaken, to ascertain if the shuttle run test in schools is a good measure of recording fitness in this age group. Only one data point lied outside the 95% limits, indicating a reasonably accurate agreement between the measures, with a 9.7 (ml/kg/min) bias of overestimation of VO2Max from the shuttle run test.

**Table:** The results for Bland Altman Plot of the CPET test against the shuttle run test, with confidence intervals

|       | SE     | Lower | Upper         |
|-------|--------|-------|---------------|
| Mean  | 9.7    | 0.901 | 7.832 11.487  |
| SD    | 5.5    |       |               |
| Lower | -1.084 | 1.554 | -4.236 2.068  |
| Upper | 20.403 | 1.554 | 17.251 23.555 |
| n     | 37     |       |               |
| r     | 0.799  | alpha | 0.05          |

**REFERENCES**

1. Wassenaar TM, Wheatley CM, Beale N, *et al.* Effects of a programme of vigorous physical activity during secondary school physical education on academic performance, fitness, cognition, mental health and the brain of adolescents (Fit to Study): study protocol for a cluster-randomised trial. *Trials* 2019;**20**:189.
2. Godfrey S, Davies C. Estimates of arterial PCO2 and their effect on the calculated values of cardiac output and dead space on exercise. *Clin Sci.* 1970;**39**:529-37.
3. Leger L, Mercier D, Gadoury C, *et al.* The multistage 20 metre shuttle run test for aerobic fitness. *J Sports Sci.* 1988;**6**:93-101.

Exploring activity levels in physical education lessons in the UK: A cross-sectional examination of activity types and fitness levels

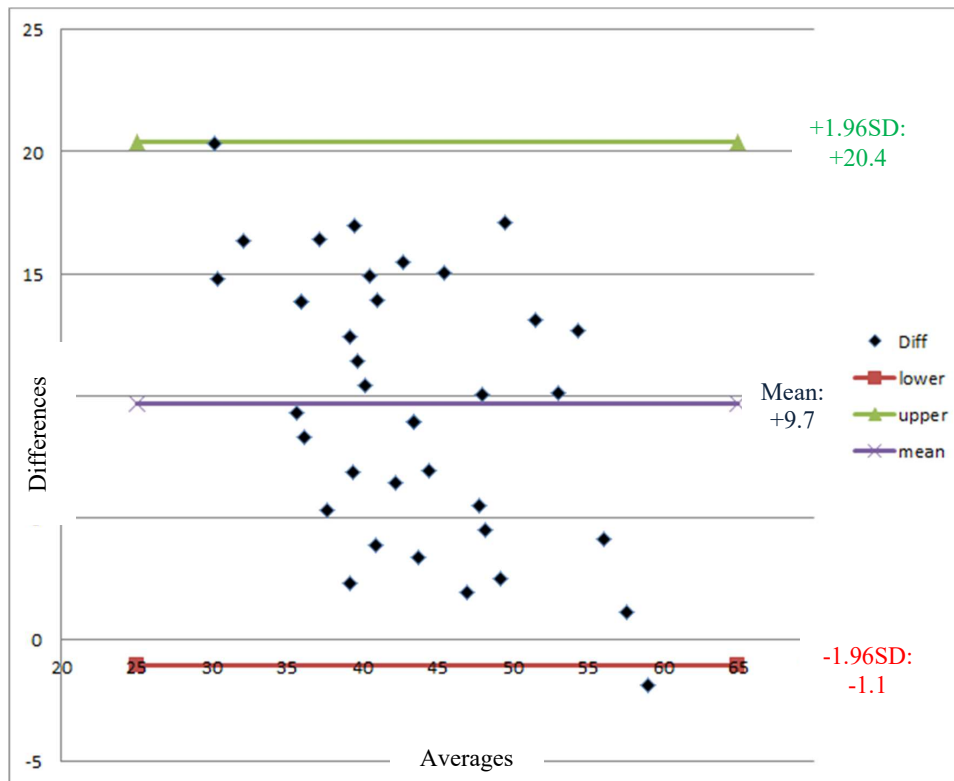

**Figure:** A Bland Altman Plot of the CPET (x axis) against the shuttle run test results
