# Supplementary material for: Exploring activity levels in physical education lessons in the UK: a cross-sectional examination of activity types and fitness levels
Source: HighWire-hosted journal article supplement (doi:10.1136/bmjsem-2020-000924), 2021-03-01
Supplement: bmjsem-2020-000924supp006_data_supplement.pdf [file bmjsem-2020-000924supp006_data_supplement.pdf]

Exploring activity levels in physical education lessons in the UK: A cross-sectional examination of activity types and fitness levels

### SUPPLEMENTARY FILE 6: Demographic data by school and lesson variables – tables (PA in PE)

**Tables: (Lesson-level)** demographic data by school and lesson variables

| No. of Lessons          | School Type      |                      | Tertile        |                  |                | Lesson Location   |                     |                  | Overall<br>(n=249) |
|-------------------------|------------------|----------------------|----------------|------------------|----------------|-------------------|---------------------|------------------|--------------------|
|                         | Co-Ed<br>(n=206) | Single Sex<br>(n=43) | High<br>(n=82) | Medium<br>(n=62) | Low<br>(n=105) | Indoors<br>(n=49) | Outdoors<br>(n=177) | In/Out<br>(n=23) |                    |
| Invasion Games          | 31 (15.0%)       | 6 (14.0%)            | 13 (15.9%)     | 15 (24.2%)       | 9 (8.6%)       | 9 (18.4%)         | 28 (15.8%)          | 0 (0%)           | 37 (14.9%)         |
| Net/wall/racket games   | 14 (6.8%)        | 2 (4.7%)             | 4 (4.9%)       | 1 (1.6%)         | 11 (10.5%)     | 6 (12.2%)         | 10 (5.6%)           | 0 (0%)           | 16 (6.4%)          |
| Fielding/striking games | 76 (36.9%)       | 11 (25.6%)           | 25 (30.5%)     | 25 (40.3%)       | 37 (35.2%)     | 9 (18.4%)         | 76 (42.9%)          | 2 (8.7%)         | 87 (34.9%)         |
| Athletics               | 7 (3.4%)         | 5 (11.6%)            | 2 (2.4%)       | 5 (8.1%)         | 5 (4.8%)       | 0 (0%)            | 12 (6.8%)           | 0 (0%)           | 12 (4.8%)          |
| Fitness                 | 14 (6.8%)        | 2 (4.7%)             | 4 (4.9%)       | 0 (0%)           | 12 (11.4%)     | 15 (30.6%)        | 1 (0.6%)            | 0 (0%)           | 16 (6.4%)          |
| Adventure/Games         | 3 (1.5%)         | 1 (2.3%)             | 1 (1.2%)       | 0 (0%)           | 3 (2.9%)       | 2 (4.1%)          | 2 (1.1%)            | 0 (0%)           | 4 (1.6%)           |
| Various                 | 43 (20.9%)       | 13 (30.2%)           | 19 (23.2%)     | 14 (22.6%)       | 23 (21.9%)     | 4 (8.2%)          | 31 (17.5%)          | 21 (91.3%)       | 56 (22.5%)         |
| Athletics-Field         | 10 (4.9%)        | 3 (7.0%)             | 10 (12.2%)     | 1 (1.6%)         | 2 (1.9%)       | 4 (8.2%)          | 9 (5.1%)            | 0 (0%)           | 13 (5.2%)          |
| Athletics-Track         | 8 (3.9%)         | 0 (0%)               | 4 (4.9%)       | 1 (1.6%)         | 3 (2.9%)       | 0 (0%)            | 8 (4.5%)            | 0 (0%)           | 8 (3.2%)           |

| No. of Lessons          | Lesson Type     |                |                  | Overall<br>(n=249) |
|-------------------------|-----------------|----------------|------------------|--------------------|
|                         | Girls<br>(n=60) | Boys<br>(n=86) | Mixed<br>(n=103) |                    |
| Invasion Games          | 13 (21.7%)      | 19 (22.1%)     | 5 (4.9%)         | 37 (14.9%)         |
| Net/wall/racket games   | 3 (5.0%)        | 8 (9.3%)       | 5 (4.9%)         | 16 (6.4%)          |
| Fielding/striking games | 17 (28.3%)      | 37 (43.0%)     | 33 (32.0%)       | 87 (34.9%)         |
| Athletics               | 5 (8.3%)        | 4 (4.7%)       | 3 (2.9%)         | 12 (4.8%)          |
| Fitness                 | 4 (6.7%)        | 8 (9.3%)       | 4 (3.9%)         | 16 (6.4%)          |
| Adventure/Games         | 1 (1.7%)        | 2 (2.3%)       | 1 (1.0%)         | 4 (1.6%)           |
| Various                 | 14 (23.3%)      | 1 (1.2%)       | 41 (39.8%)       | 56 (22.5%)         |
| Athletics-Field         | 3 (5.0%)        | 5 (5.8%)       | 5 (4.9%)         | 13 (5.2%)          |
| Athletics-Track         | 0 (0%)          | 2 (2.3%)       | 6 (5.8%)         | 8 (3.2%)           |

## Exploring activity levels in physical education lessons in the UK: A cross-sectional examination of activity types and fitness levels

**Tables: (Pupil-level)** demographic data by school and lesson variables

| No. of Pupils<br>ActivityGroup | School Type       |                        | Terile           |                    |                 | Lesson Location     |                      |                    | Overall<br>(n=9483) |
|--------------------------------|-------------------|------------------------|------------------|--------------------|-----------------|---------------------|----------------------|--------------------|---------------------|
|                                | Co-Ed<br>(n=8059) | Single Sex<br>(n=1424) | High<br>(n=2769) | Medium<br>(n=2150) | Low<br>(n=4564) | Indoors<br>(n=1565) | Outdoors<br>(n=6415) | In/Out<br>(n=1503) |                     |
| Invasion Games                 | 920 (11.4%)       | 165 (11.6%)            | 351 (12.7%)      | 400 (18.6%)        | 334 (7.3%)      | 322 (20.6%)         | 763 (11.9%)          | 0 (0%)             | 1085 (11.4%)        |
| Net/wall/racket games          | 347 (4.3%)        | 47 (3.3%)              | 108 (3.9%)       | 27 (1.3%)          | 259 (5.7%)      | 145 (9.3%)          | 249 (3.9%)           | 0 (0%)             | 394 (4.2%)          |
| Fielding/striking games        | 2539 (31.5%)      | 373 (26.2%)            | 738 (26.7%)      | 696 (32.4%)        | 1478 (32.4%)    | 348 (22.2%)         | 2453 (38.2%)         | 111 (7.4%)         | 2912 (30.7%)        |
| Athletics                      | 219 (2.7%)        | 110 (7.7%)             | 73 (2.6%)        | 110 (5.1%)         | 146 (3.2%)      | 0 (0%)              | 329 (5.1%)           | 0 (0%)             | 329 (3.5%)          |
| Fitness                        | 458 (5.7%)        | 43 (3.0%)              | 106 (3.8%)       | 0 (0%)             | 395 (8.7%)      | 468 (29.9%)         | 33 (0.5%)            | 0 (0%)             | 501 (5.3%)          |
| Adventure/Games                | 96 (1.2%)         | 16 (1.1%)              | 16 (0.6%)        | 0 (0%)             | 96 (2.1%)       | 47 (3.0%)           | 65 (1.0%)            | 0 (0%)             | 112 (1.2%)          |
| Various                        | 2977 (36.9%)      | 586 (41.2%)            | 1037 (37.5%)     | 881 (41.0%)        | 1645 (36.0%)    | 160 (10.2%)         | 2011 (31.3%)         | 1392 (92.6%)       | 3563 (37.6%)        |
| Athletics-Field                | 228 (2.8%)        | 84 (5.9%)              | 220 (7.9%)       | 20 (0.9%)          | 72 (1.6%)       | 75 (4.8%)           | 237 (3.7%)           | 0 (0%)             | 312 (3.3%)          |
| Athletics-Track                | 275 (3.4%)        | 0 (0%)                 | 120 (4.3%)       | 16 (0.7%)          | 139 (3.0%)      | 0 (0%)              | 275 (4.3%)           | 0 (0%)             | 275 (2.9%)          |

| No. of Pupils<br>ActivityGroup | Lesson Type       |                  |                   | Overall<br>(n=9483) |
|--------------------------------|-------------------|------------------|-------------------|---------------------|
|                                | Girls<br>(n=1961) | Boys<br>(n=2446) | Mixed<br>(n=5076) |                     |
| Invasion Games                 | 328 (16.7%)       | 621 (25.4%)      | 136 (2.7%)        | 1085 (11.4%)        |
| Net/wall/racket games          | 73 (3.7%)         | 191 (7.8%)       | 130 (2.6%)        | 394 (4.2%)          |
| Fielding/striking games        | 601 (30.6%)       | 1058 (43.3%)     | 1253 (24.7%)      | 2912 (30.7%)        |
| Athletics                      | 110 (5.6%)        | 105 (4.3%)       | 114 (2.2%)        | 329 (3.5%)          |
| Fitness                        | 88 (4.5%)         | 243 (9.9%)       | 170 (3.3%)        | 501 (5.3%)          |
| Adventure/Games                | 16 (0.8%)         | 55 (2.2%)        | 41 (0.8%)         | 112 (1.2%)          |
| Various                        | 661 (33.7%)       | 20 (0.8%)        | 2882 (56.8%)      | 3563 (37.6%)        |
| Athletics-Field                | 84 (4.3%)         | 93 (3.8%)        | 135 (2.7%)        | 312 (3.3%)          |
| Athletics-Track                | 0 (0%)            | 60 (2.5%)        | 215 (4.2%)        | 275 (2.9%)          |
