# Supplementary material for: Exploring activity levels in physical education lessons in the UK: a cross-sectional examination of activity types and fitness levels
Source: HighWire-hosted journal article supplement (doi:10.1136/bmjsem-2020-000924), 2021-03-01
Supplement: bmjsem-2020-000924supp007_data_supplement.pdf [file bmjsem-2020-000924supp007_data_supplement.pdf]

Exploring activity levels in physical education lessons in the UK: A cross-sectional examination of activity types and fitness levels

**SUPPLEMENTARY FILE 7: Fitness model estimates**

**Table:** Summary of fitness model estimates, CIs and p-values

| <b>Model 1 estimate<sup>a</sup></b> | <b><math>\beta</math></b> | <b>95% CI</b>  | <b>Model 2 estimate<sup>a</sup></b> | <b><math>\beta</math></b> | <b>95% CI</b>  |
|-------------------------------------|---------------------------|----------------|-------------------------------------|---------------------------|----------------|
| (Intercept)                         | -2.37***                  | -3.18 to -1.56 | (Intercept)                         | -2.34***                  | -3.16 to -1.52 |
| Female <sup>b</sup>                 | -0.48***                  | -0.56 to -0.39 | Tertile-Low <sup>b</sup>            | -0.40**                   | 0.16 to 0.63   |
| eFSM <sup>c</sup>                   | -0.22***                  | -0.29 to -0.15 | School Type (ST) <sup>c</sup>       | -0.11                     | -0.48 to 0.26  |
| Female*eFSM                         | -0.01                     | -0.11 to 0.09  | Tertile-Medium*ST                   | 0.27                      | -0.31 to 0.84  |
|                                     |                           |                | Tertile-Low*ST                      | -0.03                     | -0.55 to -0.49 |

<sup>a</sup> Fully-adjusted model including age, term of test, and school effects; fitness scores are orderNorm transformed  
<sup>b</sup> Reference category: male  
<sup>c</sup> Reference category: not eligible for FSM  
\*\*\* p<.001; \*\* p<.0125; \* p<.05

| <b>Model 3 estimate<sup>a</sup></b> | <b><math>\beta</math></b> | <b>95% CI</b>  |
|-------------------------------------|---------------------------|----------------|
| (Intercept)                         | -1.95***                  | -3.03 to -0.88 |
| School Type <sup>b</sup>            | -0.02                     | -0.30 to 0.26  |

<sup>a</sup> Fully-adjusted model including FSM, age, term of test, and school effects; fitness scores are orderNorm transformed  
<sup>b</sup> Reference category: Co-educational  
\*\*\* p<.001; \*\* p<.0125; \* p<.05

<sup>a</sup> Fully-adjusted model including sex, FSM, age, term of test, and school effects; fitness scores are orderNorm transformed  
<sup>b</sup> Reference category: High  
<sup>c</sup> Reference category: Co-educational  
\*\*\* p<.001; \*\* p<.0125; \* p<.05

**Notes**

*Fitness Model 1 (Pupil Sex\*Pupil FSM status - main effects and interaction)* to determine how fitness varied i) between boys and girls, ii) with FSM status and iii) to determine the interaction effect of sex with FSM status on fitness.

*Fitness Model 2 (School postcode Index of Multiple Deprivation (IMD) Tertile\*School Type - main effects and interaction)* to explore how fitness varied between school location (based on the IMD tertile), and the interaction of school type (co-educational or single sex).

*Fitness Model 3 (School Type [Girls only])* was developed to see if, for girls-only, fitness varied between school type.
