# Supplementary material for: Exploring activity levels in physical education lessons in the UK: a cross-sectional examination of activity types and fitness levels
Source: HighWire-hosted journal article supplement (doi:10.1136/bmjsem-2020-000924), 2021-03-01
Supplement: bmjsem-2020-000924supp008_data_supplement.pdf [file bmjsem-2020-000924supp008_data_supplement.pdf]

Exploring activity levels in physical education lessons in the UK: A cross-sectional examination of activity types and fitness levels

### SUPPLEMENTARY FILE 8: Pupil average time (%) for school/lesson variables - tables

**Tables:** (**Pupil-level**) pupil average time (%) in PE lessons split by PA domain, for school/lesson variables

| % of 1hr Lesson (SD) | School Type       |                        | Tertile          |                    |                 |
|----------------------|-------------------|------------------------|------------------|--------------------|-----------------|
|                      | Co-Ed<br>(n=8059) | Single Sex<br>(n=1424) | High<br>(n=2769) | Medium<br>(n=2150) | Low<br>(n=4564) |
| <b>PA Domains</b>    |                   |                        |                  |                    |                 |
| SPA                  | 44.0 (13.3)       | 45.0 (13.0)            | 44.5 (14.3)      | 43.0 (12.2)        | 44.5 (13.1)     |
| LPA                  | 31.9 (7.77)       | 32.5 (7.13)            | 32.2 (7.82)      | 32.9 (7.23)        | 31.4 (7.76)     |
| MPA                  | 16.7 (6.46)       | 16.5 (6.54)            | 16.6 (6.72)      | 17.0 (6.07)        | 16.6 (6.49)     |
| VPA                  | 7.34 (4.55)       | 6.01 (3.72)            | 6.68 (4.56)      | 7.12 (4.09)        | 7.44 (4.54)     |
| MVPA                 | 24.1 (9.45)       | 22.5 (9.19)            | 23.3 (10.1)      | 24.1 (8.83)        | 24.1 (9.24)     |

| % of 1hr Lesson (SD) | Lesson Type       |                  |                   |                     |
|----------------------|-------------------|------------------|-------------------|---------------------|
|                      | Girls<br>(n=1961) | Boys<br>(n=2446) | Mixed<br>(n=5076) | Overall<br>(n=9483) |
| SPA                  | 44.7 (12.7)       | 42.3 (13.2)      | 44.9 (13.4)       | 44.2 (13.3)         |
| LPA                  | 32.6 (7.09)       | 33.0 (7.71)      | 31.2 (7.81)       | 32.0 (7.68)         |
| MPA                  | 16.3 (6.36)       | 16.9 (6.32)      | 16.8 (6.57)       | 16.7 (6.47)         |
| VPA                  | 6.48 (3.97)       | 7.78 (4.50)      | 7.09 (4.58)       | 7.14 (4.46)         |
| MVPA                 | 22.7 (9.11)       | 24.7 (9.50)      | 23.9 (9.47)       | 23.8 (9.42)         |

## Exploring activity levels in physical education lessons in the UK: A cross-sectional examination of activity types and fitness levels

**Tables: (Lesson-level)** pupil average time (%) in PE lessons split by PA domain, for school/lesson variables

| % of 1hr Lesson (SD) | School Type      |                      | Tertile        |                  |                |
|----------------------|------------------|----------------------|----------------|------------------|----------------|
|                      | Co-Ed<br>(n=206) | Single Sex<br>(n=43) | High<br>(n=82) | Medium<br>(n=62) | Low<br>(n=105) |
| <b>PA Domains</b>    |                  |                      |                |                  |                |
| SPA                  | 43.8 (8.96)      | 46.6 (8.46)          | 45.5 (10.3)    | 43.2 (8.34)      | 43.9 (8.02)    |
| LPA                  | 32.3 (4.56)      | 31.8 (3.74)          | 31.7 (4.65)    | 33.1 (4.20)      | 32.0 (4.34)    |
| MPA                  | 16.9 (4.25)      | 16.1 (4.41)          | 16.3 (4.47)    | 17.2 (4.11)      | 16.8 (4.22)    |
| VPA                  | 7.31 (3.05)      | 5.56 (2.11)          | 6.47 (2.94)    | 6.99 (2.87)      | 7.44 (3.05)    |
| MVPA                 | 24.2 (6.30)      | 21.6 (5.75)          | 22.7 (6.76)    | 24.2 (6.28)      | 24.2 (5.83)    |

| % of 1hr Lesson (SD) | Lesson Type     |                |                  |                    |
|----------------------|-----------------|----------------|------------------|--------------------|
|                      | Girls<br>(n=60) | Boys<br>(n=86) | Mixed<br>(n=103) | Overall<br>(n=249) |
| SPA                  | 45.3 (8.61)     | 42.8 (9.31)    | 44.8 (8.70)      | 44.3 (8.93)        |
| LPA                  | 32.3 (3.63)     | 32.9 (4.78)    | 31.5 (4.47)      | 32.2 (4.43)        |
| MPA                  | 16.2 (4.37)     | 16.9 (4.47)    | 16.9 (4.07)      | 16.7 (4.28)        |
| VPA                  | 6.20 (2.61)     | 7.70 (3.19)    | 6.89 (2.91)      | 7.00 (2.98)        |
| MVPA                 | 22.4 (6.11)     | 24.6 (6.68)    | 23.8 (5.93)      | 23.7 (6.27)        |
