# Supplementary material for: Exploring activity levels in physical education lessons in the UK: a cross-sectional examination of activity types and fitness levels
Source: HighWire-hosted journal article supplement (doi:10.1136/bmjsem-2020-000924), 2021-03-01
Supplement: bmjsem-2020-000924supp009_data_supplement.pdf [file bmjsem-2020-000924supp009_data_supplement.pdf]

**SUPPLEMENTARY FILE 9: Pupil average time by activity group - tables and violin plots****Table.** Pupil average time (mins/hr) of PA domains in PE lessons split by activity group

| Time [mins/hr] (SD) | Invasion Games (n=1085) | Net/wall/racket games (n=394) | Fielding/striking games (n=2912) | Athletics (n=329) | Fitness (n=501) | Adventure/Games (n=112) | Various (n=3563) | Athletics-Field (n=312) | Athletics-Track (n=275) | Overall (n=9483) |
|---------------------|-------------------------|-------------------------------|----------------------------------|-------------------|-----------------|-------------------------|------------------|-------------------------|-------------------------|------------------|
| <b>SPA</b>          | 22.2 (7.64)             | 23.7 (8.30)                   | 27.5 (7.15)                      | 28.2 (5.74)       | 25.3 (6.85)     | 30.8 (12.2)             | 26.4 (8.00)      | 34.1 (8.72)             | 28.2 (6.75)             | 26.5 (7.97)      |
| <b>LPA</b>          | 20.8 (4.62)             | 20.6 (4.42)                   | 19.2 (4.01)                      | 18.7 (4.08)       | 18.0 (4.83)     | 17.8 (6.88)             | 19.2 (4.72)      | 16.1 (5.17)             | 18.5 (4.77)             | 19.2 (4.61)      |
| <b>MPA</b>          | 11.5 (3.79)             | 12.2 (4.67)                   | 9.46 (3.50)                      | 8.81 (2.62)       | 10.6 (4.29)     | 7.47 (3.66)             | 10.3 (3.89)      | 7.10 (3.31)             | 8.54 (3.15)             | 10.0 (3.88)      |
| <b>VPA</b>          | 5.50 (3.29)             | 3.48 (2.23)                   | 3.90 (2.16)                      | 4.37 (2.11)       | 6.11 (3.77)     | 4.01 (3.06)             | 4.17 (2.49)      | 2.70 (1.91)             | 4.74 (3.29)             | 4.29 (2.68)      |
| <b>MVPA</b>         | 17.0 (6.22)             | 15.7 (6.38)                   | 13.4 (4.97)                      | 13.2 (3.64)       | 16.7 (5.81)     | 11.5 (6.41)             | 14.4 (5.58)      | 9.80 (4.82)             | 13.3 (5.02)             | 14.3 (5.65)      |

**Table.** Pupil average % of PA domains in PE lessons split by activity group

| % of Lesson (SD) | Invasion Games (n=1085) | Net/wall/racket games (n=394) | Fielding/striking games (n=2912) | Athletics (n=329) | Fitness (n=501) | Adventure/Games (n=112) | Various (n=3563) | Athletics-Field (n=312) | Athletics-Track (n=275) | Overall (n=9483) |
|------------------|-------------------------|-------------------------------|----------------------------------|-------------------|-----------------|-------------------------|------------------|-------------------------|-------------------------|------------------|
| <b>SPA</b>       | 37.0 (12.7)             | 39.5 (13.8)                   | 45.8 (11.9)                      | 46.9 (9.56)       | 42.1 (11.4)     | 51.3 (20.4)             | 44.0 (13.3)      | 56.8 (14.5)             | 47.0 (11.3)             | 44.2 (13.3)      |
| <b>LPA</b>       | 34.6 (7.69)             | 34.3 (7.37)                   | 32.0 (6.68)                      | 31.1 (6.80)       | 30.0 (8.05)     | 29.6 (11.5)             | 31.9 (7.87)      | 26.8 (8.62)             | 30.8 (7.96)             | 32.0 (7.68)      |
| <b>MPA</b>       | 19.2 (6.31)             | 20.4 (7.79)                   | 15.8 (5.83)                      | 14.7 (4.37)       | 17.7 (7.15)     | 12.4 (6.10)             | 17.1 (6.48)      | 11.8 (5.52)             | 14.2 (5.25)             | 16.7 (6.47)      |
| <b>VPA</b>       | 9.16 (5.49)             | 5.81 (3.72)                   | 6.50 (3.60)                      | 7.29 (3.51)       | 10.2 (6.29)     | 6.68 (5.10)             | 6.95 (4.15)      | 4.50 (3.19)             | 7.90 (5.48)             | 7.14 (4.46)      |
| <b>MVPA</b>      | 28.4 (10.4)             | 26.2 (10.6)                   | 22.3 (8.29)                      | 22.0 (6.06)       | 27.9 (9.69)     | 19.1 (10.7)             | 24.0 (9.31)      | 16.3 (8.03)             | 22.1 (8.36)             | 23.8 (9.42)      |

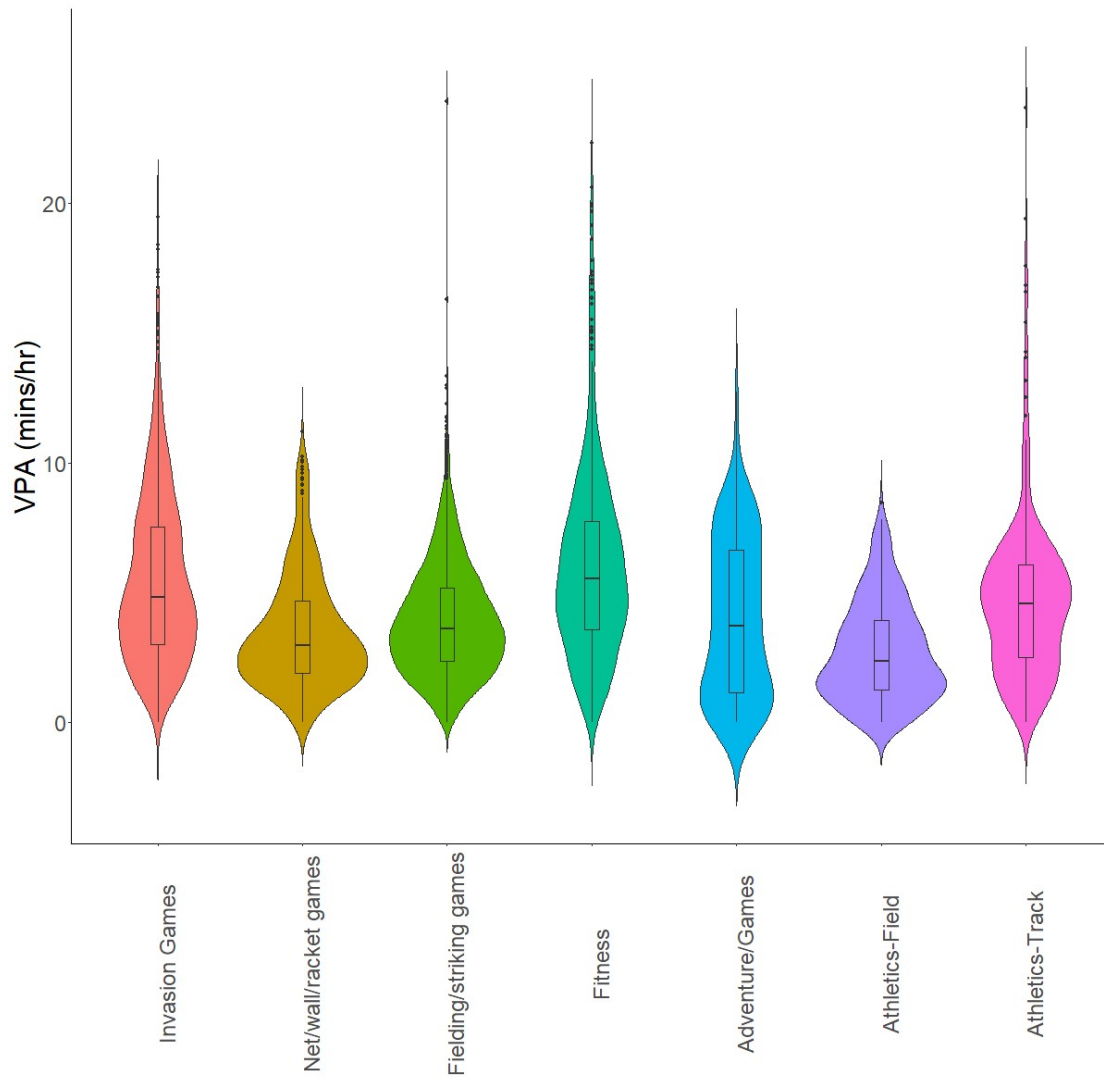

**Figure:** Violin plot of pupil average time (mins/hr) in PE lessons split by activity group for VPA

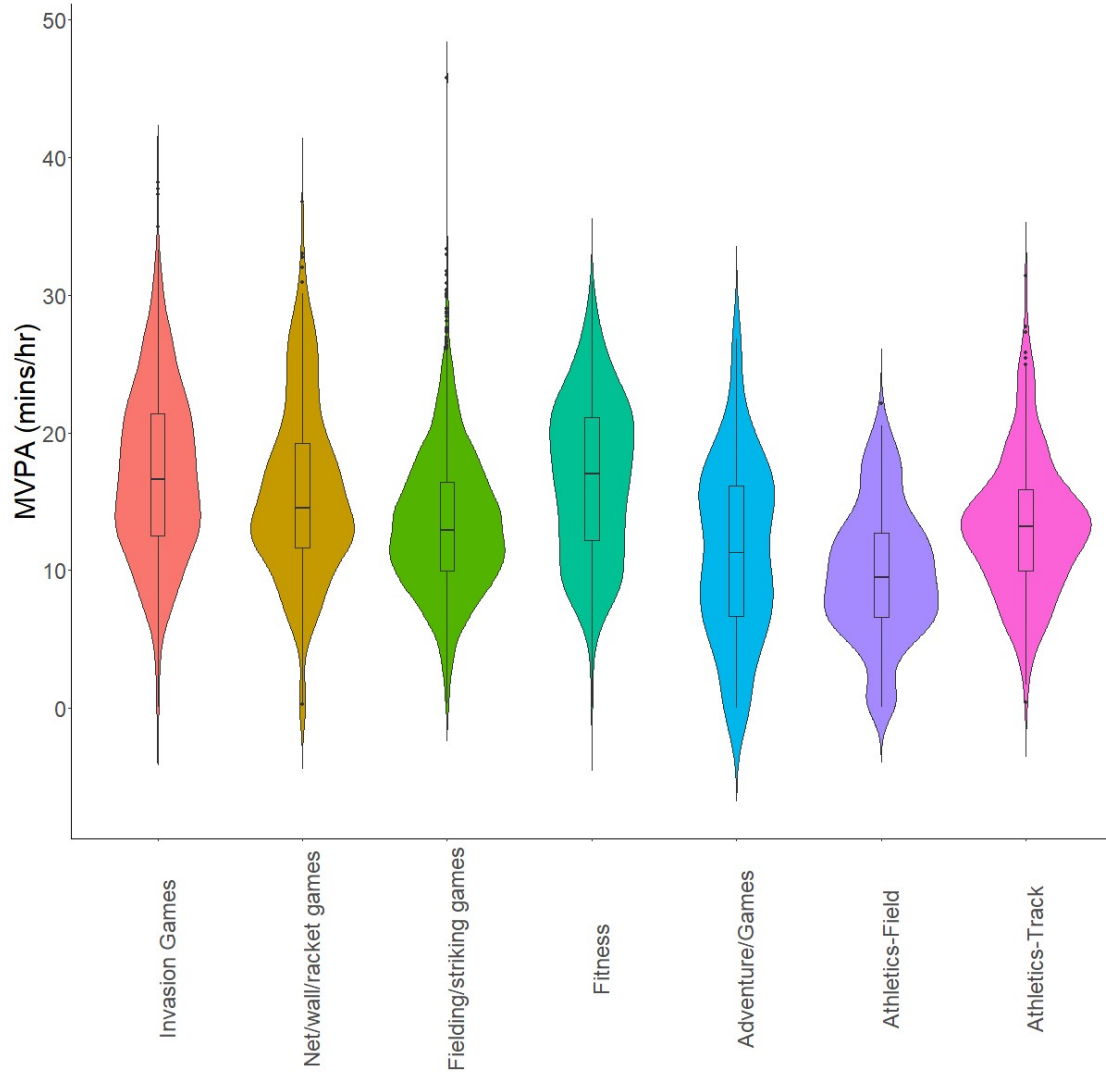

**Figure:** Violin plot of pupil average time (mins/hr) in PE lessons split by activity group for MVPA

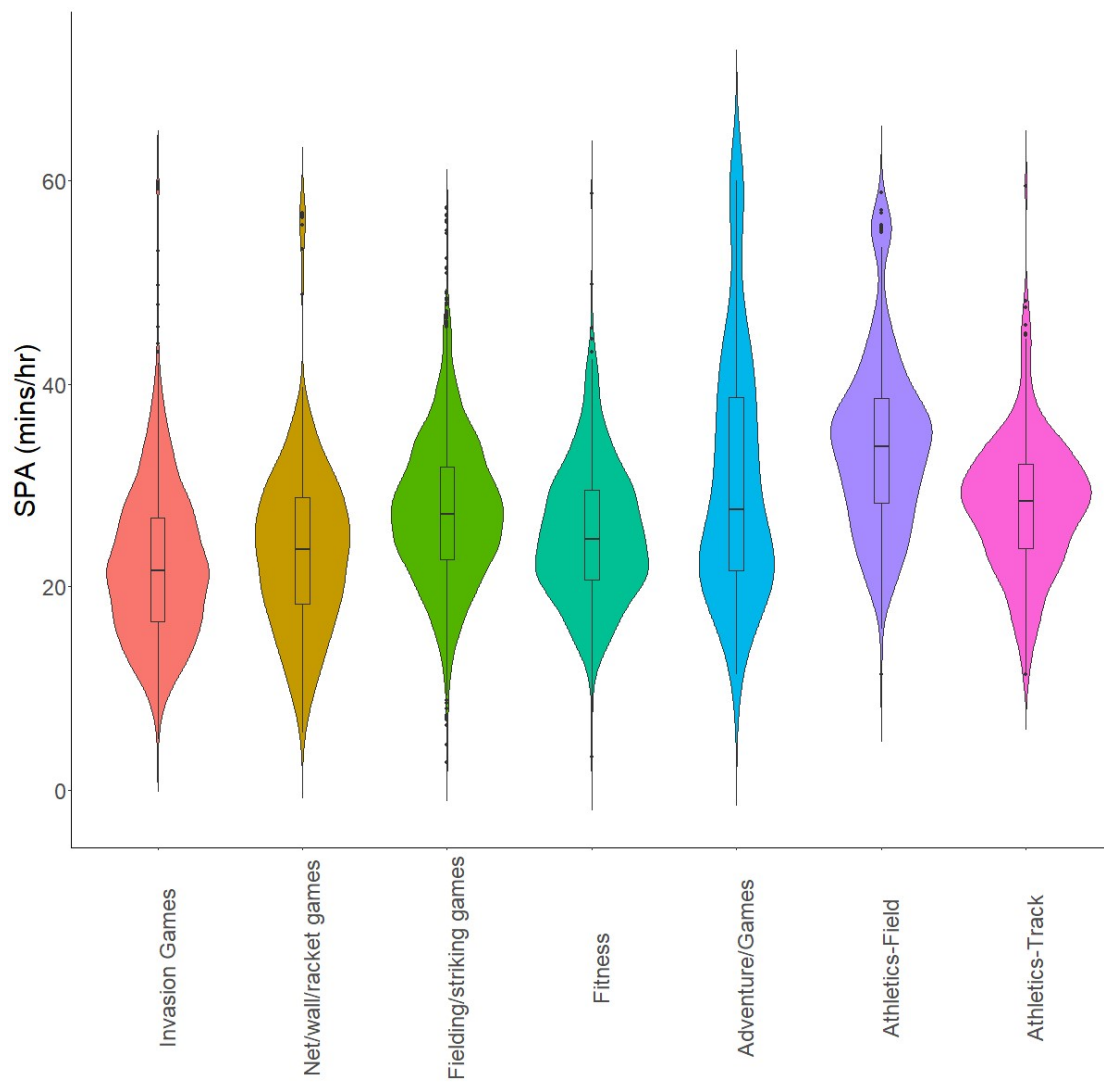

**Figure:** Violin plot of pupil average time (mins/hr) in PE lessons split by activity group for SPA
