# Supplementary material for: Exploring activity levels in physical education lessons in the UK: a cross-sectional examination of activity types and fitness levels
Source: HighWire-hosted journal article supplement (doi:10.1136/bmjsem-2020-000924), 2021-03-01
Supplement: bmjsem-2020-000924supp010_data_supplement.pdf [file bmjsem-2020-000924supp010_data_supplement.pdf]

Exploring activity levels in physical education lessons in the UK: A cross-sectional examination of activity types and fitness levels

### SUPPLEMENTARY FILE 10: PA in PE model estimates

**Tables:** Summary of PA in PE model estimates, CIs and p-values

| Table 1   Model 1 estimate <sup>a</sup> | VPA   |               | MVPA  |               | SPA   |               |
|-----------------------------------------|-------|---------------|-------|---------------|-------|---------------|
|                                         | B     | 95% CI        | B     | 95% CI        | B     | 95% CI        |
| (Intercept)                             | 0.00  | -0.61 to 0.62 | 0.04  | -0.51 to 0.59 | 0.06  | -0.47 to 0.59 |
| School Type <sup>b</sup>                | -0.18 | -0.62 to 0.26 | -0.02 | -0.42 to 0.37 | 0.05  | -0.33 to 0.43 |
| School FSM <sup>c</sup>                 | -0.02 | -0.42 to 0.39 | 0.02  | -0.35 to 0.38 | -0.02 | -0.37 to 0.33 |
| Lesson Type-Boys <sup>d</sup>           | 0.23  | -0.24 to 0.71 | 0.25  | -0.17 to 0.68 | -0.21 | -0.63 to 0.20 |
| Lesson Type-Mixed <sup>d</sup>          | -0.08 | -0.54 to 0.39 | 0.10  | -0.32 to 0.52 | -0.01 | -0.42 to 0.40 |
| School FSM*Lesson Type-Boys             | -0.15 | -0.68 to 0.39 | -0.15 | -0.62 to 0.33 | 0.18  | -0.28 to 0.64 |
| School FSM*Lesson Type-Mixed            | 0.15  | -0.37 to 0.67 | 0.04  | -0.43 to 0.51 | -0.00 | -0.46 to 0.45 |

<sup>a</sup> Fully-adjusted model including lesson length, lesson location, activity and school effects; SPA/MVPA are orderNorm transformed; VPA are Yeo-Johnson transformed

<sup>b</sup> Reference category: Co-educational; <sup>c</sup> Reference category: Above average; <sup>d</sup> Reference category: Girls-only

\*\*\* p<.001; \*\* p<.0125; \* p<.05

| Table 2   Model 2 estimate <sup>a</sup> | VPA      |                | MVPA     |                | SPA     |               |
|-----------------------------------------|----------|----------------|----------|----------------|---------|---------------|
|                                         | B        | 95% CI         | B        | 95% CI         | B       | 95% CI        |
| (Intercept)                             | 0.04     | -0.56 to 0.64  | 0.08     | -0.45 to 0.62  | 0.01    | -0.51 to 0.53 |
| Net/wall/racket games <sup>b</sup>      | -0.38*   | -0.68 to -0.07 | -0.16    | -0.46 to 0.13  | 0.10    | -0.19 to 0.39 |
| Fielding/striking games <sup>b</sup>    | -0.49*** | -0.74 to -0.24 | -0.55*** | -0.79 to -0.32 | 0.54*** | 0.31 to 0.77  |
| Athletics                               | -0.09    | -0.47 to 0.29  | -0.45*   | -0.81 to -0.08 | 0.58**  | 0.22 to 0.94  |
| Fitness <sup>b</sup>                    | 0.29     | -0.06 to 0.63  | 0.22     | -0.11 to 0.55  | -0.18   | -0.51 to 0.14 |
| Adventure/Games <sup>b</sup>            | -0.50    | -1.06 to 0.06  | -0.81**  | -1.35 to -0.27 | 0.70**  | 0.17 to 1.24  |
| Various                                 | -0.40**  | -0.71 to -0.09 | -0.47**  | -0.76 to -0.18 | 0.55*** | 0.26 to 0.83  |
| Athletics-Field <sup>b</sup>            | -0.81*** | -1.23 to -0.39 | -1.17*** | -1.56 to -0.78 | 1.34*** | 0.95 to 1.72  |
| Athletics-Track <sup>b</sup>            | 0.38*    | 0.01 to 0.74   | 0.02     | -0.33 to 0.37  | 0.24    | -0.10 to 0.58 |

<sup>a</sup> Fully-adjusted model including lesson length, lesson location, activity and school effects; SPA/MVPA are orderNorm transformed; VPA are Yeo-Johnson transformed.

<sup>b</sup> Reference category: Invasion games

\*\*\* p<.001; \*\* p<.0125; \* p<.05

Significant differences observed for activity group; post-hoc analysis conducted – see Table 4.

## Exploring activity levels in physical education lessons in the UK: A cross-sectional examination of activity types and fitness levels

| Table 3   Model 3 estimate <sup>a</sup>                           | VPA     |                | MVPA    |                | SPA     |               |
|-------------------------------------------------------------------|---------|----------------|---------|----------------|---------|---------------|
|                                                                   | B       | 95% CI         | B       | 95% CI         | B       | 95% CI        |
| (Intercept)                                                       | 0.17    | -0.40 to 0.74  | 0.19    | -0.16 to 1.09  | 0.00    | -0.54 to 0.54 |
| Net/wall/racket games <sup>b</sup>                                | -0.10   | -0.74 to 0.54  | 0.46    | -1.04 to -0.22 | -0.39   | -1.02 to 0.25 |
| Fielding/striking games <sup>b</sup>                              | -0.29   | -0.72 to 0.13  | -0.63** | -0.80 to 0.42  | 0.61**  | 0.19 to 1.03  |
| Athletics <sup>b</sup>                                            | 0.15    | -0.48 to 0.78  | -0.19   | -1.12 to -0.01 | 0.30    | -0.32 to 0.92 |
| Fitness <sup>b</sup>                                              | -0.57*  | -1.13 to -0.00 | -0.57*  | -1.77 to 0.30  | 0.10    | -0.46 to 0.66 |
| Adventure/Games <sup>b</sup>                                      | -0.49   | -1.55 to 0.56  | -0.73   | -0.74 to 0.14  | 0.46    | -0.58 to 1.50 |
| Various <sup>b</sup>                                              | -0.14   | -0.60 to 0.32  | -0.30   | -1.46 to -0.19 | 0.32    | -0.13 to 0.77 |
| Athletics-Field <sup>b</sup>                                      | -0.30   | -0.96 to 0.35  | -0.82** | -0.44 to 0.53  | 1.07*** | 0.42 to 1.71  |
| Athletics-Track <sup>b</sup>                                      | 0.34    | -0.15 to 0.83  | 0.04    | -0.29 to 0.62  | 0.13    | -0.36 to 0.61 |
| Lesson Type-Boys <sup>c</sup>                                     | 0.25    | -0.24 to 0.73  | 0.16    | -0.44 to 0.69  | -0.20   | -0.66 to 0.27 |
| Lesson Type-Mixed <sup>c</sup>                                    | 0.05    | -0.53 to 0.63  | 0.13    | -0.52 to 0.24  | 0.03    | -0.54 to 0.60 |
| School Type <sup>d</sup>                                          | -0.37   | -0.78 to 0.04  | -0.14   | -1.52 to 0.02  | 0.14    | -0.25 to 0.53 |
| ActivityGroupNet/wall/racket games:LessonTypeBoys <sup>c</sup>    | -0.48   | -1.27 to 0.32  | -0.75   | -0.32 to 0.70  | 0.54    | -0.24 to 1.32 |
| ActivityGroupFielding/striking games:LessonTypeBoys <sup>c</sup>  | -0.05   | -0.58 to 0.49  | 0.19    | -1.20 to 0.42  | -0.06   | -0.58 to 0.46 |
| ActivityGroupAthletics:LessonTypeBoys <sup>c</sup>                | -0.36   | -1.20 to 0.48  | -0.39   | 0.27 to 1.64   | 0.40    | -0.43 to 1.22 |
| ActivityGroupFitness:LessonTypeBoys <sup>c</sup>                  | 0.70    | -0.00 to 1.40  | 0.96**  | -1.58 to 0.93  | -0.46   | -1.15 to 0.23 |
| ActivityGroupAdventure/Games:LessonTypeBoys <sup>c</sup>          | -0.41   | -1.70 to 0.88  | -0.33   | -2.12 to 0.07  | 0.54    | -0.73 to 1.82 |
| ActivityGroupVarious:LessonTypeBoys <sup>c</sup>                  | -0.99   | -2.12 to 0.14  | -1.02   | -1.53 to 0.34  | 1.28*   | 0.17 to 2.39  |
| ActivityGroupAthletics-Field:LessonTypeBoys <sup>c</sup>          | -1.03*  | -2.02 to -0.05 | -0.60   | -1.40 to 0.34  | 0.59    | -0.35 to 1.54 |
| ActivityGroupAthletics-Track:LessonTypeBoys <sup>c</sup>          | -0.68   | -1.57 to 0.21  | -0.53   | -1.55 to 0.06  | 0.32    | -0.56 to 1.19 |
| ActivityGroupNet/wall/racket games:LessonTypeMixed <sup>c</sup>   | -0.33   | -1.14 to 0.49  | -0.74   | -0.57 to 0.64  | 0.53    | -0.28 to 1.33 |
| ActivityGroupFielding/striking games:LessonTypeMixed <sup>c</sup> | -0.36   | -0.98 to 0.26  | 0.04    | -1.18 to 0.64  | -0.19   | -0.79 to 0.42 |
| ActivityGroupAthletics:LessonTypeMixed <sup>c</sup>               | -0.10   | -1.04 to 0.84  | -0.27   | 0.26 to 1.87   | 0.32    | -0.60 to 1.24 |
| ActivityGroupFitness:LessonTypeMixed <sup>c</sup>                 | 1.69*** | 0.86 to 2.51   | 1.06**  | -1.18 to 1.72  | -0.19   | -1.00 to 0.63 |
| ActivityGroupAdventure/Games:LessonTypeMixed <sup>c</sup>         | 0.49    | -0.99 to 1.98  | 0.27    | -0.81 to 0.41  | -0.25   | -1.71 to 1.22 |
| ActivityGroupVarious:LessonTypeMixed <sup>c</sup>                 | -0.25   | -0.88 to 0.38  | -0.20   | -1.40 to 0.42  | 0.19    | -0.42 to 0.81 |
| ActivityGroupAthletics-Field:LessonTypeMixed <sup>c</sup>         | -0.64   | -1.58 to 0.29  | -0.49   | -0.16 to 1.09  | 0.19    | -0.73 to 1.11 |

<sup>a</sup>Fully-adjusted model including lesson length, lesson location, and school effects; SPA/MVPA are orderNorm transformed; VPA are Yeo-Johnson transformed.

<sup>b</sup>Reference category: Invasion games    <sup>c</sup>Reference category: Girls-only    <sup>d</sup>Reference category: Co-educational

<sup>e</sup>Reference category: ActivityGroupInvasion games:LessonTypeGirls

\*\*\* p<.001; \*\* p<.0125; \* p<.05

Significant differences observed for ActivityGroup\*LessonType; post-hoc analysis conducted
