# Supplementary material for: Exploring activity levels in physical education lessons in the UK: a cross-sectional examination of activity types and fitness levels
Source: HighWire-hosted journal article supplement (doi:10.1136/bmjsem-2020-000924), 2021-03-01
Supplement: bmjsem-2020-000924supp011_data_supplement.pdf [file bmjsem-2020-000924supp011_data_supplement.pdf]

Exploring activity levels in physical education lessons in the UK: A cross-sectional examination of activity types and fitness levels

**SUPPLEMENTARY FILE 11: LSMeans tables**

**Tables:** summary of the fixed effect interactions (LS Means) for Models 2, 3 and 4, for VPA, MVPA & SPA

Table 1 | Model 2 | Activity Group | VPA | lsmeans

| Activity Group          | lsmean  | SE    | df  | lower.CL | upper.CL |
|-------------------------|---------|-------|-----|----------|----------|
| Invasion games          | 0.1244  | 0.162 | 219 | -0.1945  | 0.44336  |
| Net/wall/racket games   | -0.2481 | 0.169 | 311 | -0.5807  | 0.08456  |
| Fielding/striking games | -0.3645 | 0.135 | 169 | -0.631   | -0.09806 |
| Athletics               | 0.0354  | 0.201 | 276 | -0.3598  | 0.43056  |
| Fitness                 | 0.4115  | 0.203 | 273 | 0.0126   | 0.8103   |
| Adventure/Games         | -0.3718 | 0.3   | 264 | -0.9616  | 0.21798  |
| Various                 | -0.2662 | 0.137 | 163 | -0.5374  | 0.00492  |
| Athletics-Field         | -0.679  | 0.225 | 225 | -1.1214  | -0.23652 |
| Athletics-Track         | 0.5036  | 0.197 | 368 | 0.1169   | 0.89035  |

Table 2 | Model 3 | Activity Group\*Lesson Type | VPA | lsmeans

| Activity Group          | LessonType | lsmean  | SE    | df    | lower.CL | upper.CL |
|-------------------------|------------|---------|-------|-------|----------|----------|
| Invasion games          | Girls      | 0.0197  | 0.227 | 225.4 | -0.427   | 0.4665   |
| Net/wall/racket games   | Girls      | -0.0317 | 0.445 | 297   | -0.907   | 0.8439   |
| Fielding/striking games | Girls      | -0.3135 | 0.197 | 205.8 | -0.702   | 0.0747   |
| Athletics               | Girls      | 0.1261  | 0.316 | 280.3 | -0.496   | 0.7484   |
| Fitness                 | Girls      | -0.5695 | 0.325 | 309.3 | -1.21    | 0.0705   |
| Adventure/Games         | Girls      | -0.5018 | 0.56  | 274.7 | -1.604   | 0.6005   |
| Various                 | Girls      | -0.1548 | 0.214 | 226.5 | -0.577   | 0.2673   |
| Athletics-Field         | Girls      | -0.3095 | 0.342 | 303.2 | -0.982   | 0.3635   |
| Athletics-Track         | Girls      | nonEst  | NA    | NA    | NA       | NA       |
| Invasion games          | Boys       | 0.1838  | 0.223 | 193.2 | -0.256   | 0.6239   |
| Net/wall/racket games   | Boys       | -0.3942 | 0.27  | 292.4 | -0.926   | 0.138    |
| Fielding/striking games | Boys       | -0.1589 | 0.19  | 152.7 | -0.534   | 0.2156   |
| Athletics               | Boys       | -0.0343 | 0.315 | 300.9 | -0.654   | 0.5853   |
| Fitness                 | Boys       | 0.3213  | 0.27  | 284.7 | -0.211   | 0.8532   |
| Adventure/Games         | Boys       | -0.7201 | 0.42  | 298.6 | -1.547   | 0.1065   |
| Various                 | Boys       | -0.95   | 0.583 | 313.8 | -2.097   | 0.1972   |
| Athletics-Field         | Boys       | -1.1493 | 0.448 | 92.4  | -2.039   | -0.26    |
| Athletics-Track         | Boys       | -0.1676 | 0.415 | 297.4 | -0.984   | 0.6492   |
| Invasion games          | Mixed      | -0.0955 | 0.274 | 316.9 | -0.635   | 0.4439   |
| Net/wall/racket games   | Mixed      | -0.4406 | 0.244 | 321.2 | -0.921   | 0.0395   |
| Fielding/striking games | Mixed      | -0.6758 | 0.201 | 153.3 | -1.073   | -0.2785  |
| Athletics               | Mixed      | 0.0257  | 0.339 | 280.2 | -0.642   | 0.6937   |
| Fitness                 | Mixed      | 1.0863  | 0.334 | 299.8 | 0.43     | 1.7428   |
| Adventure/Games         | Mixed      | -0.0203 | 0.556 | 269.6 | -1.115   | 1.0744   |
| Various                 | Mixed      | -0.4141 | 0.174 | 138.6 | -0.757   | -0.0708  |
| Athletics-Field         | Mixed      | -0.9618 | 0.335 | 238.3 | -1.623   | -0.3009  |
| Athletics-Track         | Mixed      | 0.3065  | 0.242 | 289.2 | -0.169   | 0.7819   |

Exploring activity levels in physical education lessons in the UK: A cross-sectional examination of activity types and fitness levels

Table 3 | Model 2 | Activity Group | MVPA | lsmeans

| Activity Group          | lsmean | SE    | df  | lower.CL  | upper.CL |
|-------------------------|--------|-------|-----|-----------|----------|
| Invasion games          | 0.341  | 0.149 | 216 | 0.047069  | 0.6356   |
| Net/wall/racket games   | 0.174  | 0.159 | 316 | -0.138372 | 0.4863   |
| Fielding/striking games | -0.21  | 0.123 | 170 | -0.452468 | 0.0334   |
| Athletics               | -0.102 | 0.189 | 278 | -0.472863 | 0.2697   |
| Fitness                 | 0.566  | 0.19  | 275 | 0.192397  | 0.9391   |
| Adventure/Games         | -0.462 | 0.286 | 268 | -1.024355 | 0.1006   |
| Various                 | -0.125 | 0.125 | 165 | -0.37155  | 0.1221   |
| Athletics-Field         | -0.823 | 0.208 | 214 | -1.231889 | -0.4137  |
| Athletics-Track         | 0.367  | 0.186 | 386 | 0.000293  | 0.733    |

Table 4 | Model 3 | Activity Group\*Lesson Type | MVPA | lsmeans

| Activity Group          | LessonType | lsmean  | SE    | df  | lower.CL | upper.CL |
|-------------------------|------------|---------|-------|-----|----------|----------|
| Invasion games          | Girls      | 0.2617  | 0.214 | 225 | -0.1602  | 0.6835   |
| Net/wall/racket games   | Girls      | 0.9681  | 0.431 | 303 | 0.1193   | 1.8169   |
| Fielding/striking games | Girls      | -0.3982 | 0.185 | 207 | -0.7634  | -0.0329  |
| Athletics               | Girls      | 0.0418  | 0.302 | 280 | -0.5526  | 0.6363   |
| Fitness                 | Girls      | -0.3185 | 0.313 | 312 | -0.9337  | 0.2968   |
| Adventure/Games         | Girls      | -0.5064 | 0.549 | 284 | -1.5879  | 0.5752   |
| Various                 | Girls      | -0.0656 | 0.202 | 230 | -0.4644  | 0.3332   |
| Athletics-Field         | Girls      | -0.5817 | 0.33  | 305 | -1.2312  | 0.0677   |
| Athletics-Track         | Girls      | nonEst  | NA    | NA  | NA       | NA       |
| Invasion games          | Boys       | 0.3364  | 0.21  | 191 | -0.0771  | 0.75     |
| Net/wall/racket games   | Boys       | 0.0554  | 0.258 | 292 | -0.4531  | 0.5639   |
| Fielding/striking games | Boys       | -0.106  | 0.177 | 153 | -0.4551  | 0.2432   |
| Athletics               | Boys       | -0.2419 | 0.304 | 302 | -0.84    | 0.3562   |
| Fitness                 | Boys       | 0.7339  | 0.258 | 286 | 0.2262   | 1.2417   |
| Adventure/Games         | Boys       | -0.7335 | 0.406 | 300 | -1.5321  | 0.0651   |
| Various                 | Boys       | -0.9797 | 0.564 | 317 | -2.0902  | 0.1309   |
| Athletics-Field         | Boys       | -1.0823 | 0.41  | 91  | -1.8963  | -0.2682  |
| Athletics-Track         | Boys       | -0.1661 | 0.401 | 298 | -0.9556  | 0.6234   |
| Invasion games          | Mixed      | 0.2098  | 0.263 | 315 | -0.3069  | 0.7264   |
| Net/wall/racket games   | Mixed      | 0.027   | 0.234 | 334 | -0.4332  | 0.4873   |
| Fielding/striking games | Mixed      | -0.3039 | 0.188 | 152 | -0.6746  | 0.0668   |
| Athletics               | Mixed      | -0.1711 | 0.328 | 281 | -0.8174  | 0.4752   |
| Fitness                 | Mixed      | 0.7814  | 0.32  | 300 | 0.1508   | 1.4119   |
| Adventure/Games         | Mixed      | -0.1641 | 0.539 | 272 | -1.2259  | 0.8977   |
| Various                 | Mixed      | -0.2078 | 0.161 | 140 | -0.5268  | 0.1111   |
| Athletics-Field         | Mixed      | -1.0156 | 0.318 | 233 | -1.6422  | -0.389   |
| Athletics-Track         | Mixed      | 0.3189  | 0.23  | 306 | -0.1344  | 0.7722   |

Table 5 | Model 2 | Activity Group | SPA | lsmeans

| Activity Group          | lsmean | SE    | df  | lower.CL | upper.CL |
|-------------------------|--------|-------|-----|----------|----------|
| Invasion games          | -0.387 | 0.146 | 212 | -0.6741  | -0.09922 |
| Net/wall/racket games   | -0.296 | 0.155 | 314 | -0.6014  | 0.00885  |
| Fielding/striking games | 0.147  | 0.12  | 168 | -0.0897  | 0.38343  |
| Athletics               | 0.191  | 0.185 | 277 | -0.1745  | 0.55577  |
| Fitness                 | -0.572 | 0.186 | 273 | -0.9383  | -0.20529 |
| Adventure/Games         | 0.309  | 0.282 | 268 | -0.2463  | 0.86408  |
| Various                 | 0.149  | 0.122 | 163 | -0.0915  | 0.38954  |
| Athletics-Field         | 0.942  | 0.203 | 208 | 0.5423   | 1.34233  |
| Athletics-Track         | -0.153 | 0.182 | 382 | -0.5113  | 0.20537  |

Exploring activity levels in physical education lessons in the UK: A cross-sectional examination of activity types and fitness levels

Table 6 | Model 3 | Activity Group\*Lesson Type | SPA | lsmeans

| Activity Group          | LessonType | lsmean   | SE    | df    | lower.CL | upper.CL |
|-------------------------|------------|----------|-------|-------|----------|----------|
| Invasion games          | Girls      | -0.37379 | 0.215 | 221.1 | -0.7979  | 0.0503   |
| Net/wall/racket games   | Girls      | -1.09657 | 0.435 | 301.4 | -1.9517  | -0.2414  |
| Fielding/striking games | Girls      | 0.28178  | 0.186 | 203.8 | -0.0854  | 0.6489   |
| Athletics               | Girls      | -0.02647 | 0.304 | 275.8 | -0.6243  | 0.5714   |
| Fitness                 | Girls      | -0.24808 | 0.315 | 308.1 | -0.8672  | 0.371    |
| Adventure/Games         | Girls      | 0.1416   | 0.553 | 279.7 | -0.9467  | 1.2299   |
| Various                 | Girls      | -0.01638 | 0.204 | 227.7 | -0.4176  | 0.3848   |
| Athletics-Field         | Girls      | 0.72495  | 0.332 | 301.8 | 0.0708   | 1.3791   |
| Athletics-Track         | Girls      | nonEst   | NA    | NA    | NA       | NA       |
| Invasion games          | Boys       | -0.44331 | 0.211 | 188.2 | -0.859   | -0.0276  |
| Net/wall/racket games   | Boys       | -0.29381 | 0.26  | 288   | -0.8053  | 0.2177   |
| Fielding/striking games | Boys       | 0.11637  | 0.177 | 150.1 | -0.2342  | 0.467    |
| Athletics               | Boys       | 0.2544   | 0.306 | 299.9 | -0.3481  | 0.8569   |
| Fitness                 | Boys       | -0.80308 | 0.26  | 282.9 | -1.314   | -0.2921  |
| Adventure/Games         | Boys       | 0.56927  | 0.409 | 297.7 | -0.2353  | 1.3739   |
| Various                 | Boys       | 1.15076  | 0.568 | 312.8 | 0.0331   | 2.2684   |
| Athletics-Field         | Boys       | 1.21921  | 0.41  | 89.2  | 0.4037   | 2.0347   |
| Athletics-Track         | Boys       | 0.01577  | 0.404 | 295.8 | -0.7797  | 0.8113   |
| Invasion games          | Mixed      | -0.12472 | 0.263 | 312.1 | -0.6423  | 0.3929   |
| Net/wall/racket games   | Mixed      | -0.04981 | 0.233 | 327.2 | -0.5088  | 0.4092   |
| Fielding/striking games | Mixed      | 0.22717  | 0.188 | 149.8 | -0.1448  | 0.5992   |
| Athletics               | Mixed      | 0.41556  | 0.331 | 279.6 | -0.2363  | 1.0674   |
| Fitness                 | Mixed      | -0.2882  | 0.323 | 297.3 | -0.9233  | 0.3469   |
| Adventure/Games         | Mixed      | -0.00435 | 0.544 | 271.7 | -1.0759  | 1.0672   |
| Various                 | Mixed      | 0.30931  | 0.162 | 138.6 | -0.011   | 0.6296   |
| Athletics-Field         | Mixed      | 1.0559   | 0.32  | 229.5 | 0.4257   | 1.6861   |
| Athletics-Track         | Mixed      | -0.05507 | 0.23  | 298.3 | -0.5086  | 0.3985   |

Table 7 | Model 3 | Activity Group\*Lesson Type | VPA (Girls only) | lsmeans

| Activity Group          | LessonType  | lsmean  | SE    | df    | lower.CL | upper.CL |
|-------------------------|-------------|---------|-------|-------|----------|----------|
| Invasion games          | Girls       | 0.313   | 0.413 | 104.6 | -0.506   | 1.132    |
| Athletics               | Girls       | 0.2666  | 0.512 | 121.6 | -0.746   | 1.28     |
| Net/wall/racket games   | Girls       | 0.104   | 0.495 | 121.1 | -0.877   | 1.085    |
| Athletics-Field         | Girls       | -0.0773 | 0.482 | 119.9 | -1.032   | 0.878    |
| Various                 | Girls       | -0.0993 | 0.43  | 116.5 | -0.952   | 0.753    |
| Fielding/striking games | Girls       | -0.1084 | 0.405 | 106.8 | -0.911   | 0.694    |
| Fitness                 | Girls       | -0.3847 | 0.5   | 122.1 | -1.373   | 0.604    |
| Adventure/Games         | Girls       | -0.4194 | 0.669 | 105.7 | -1.746   | 0.907    |
| Fitness                 | Girls-Mixed | 0.9499  | 0.987 | 82.3  | -1.014   | 2.914    |
| Adventure/Games         | Girls-Mixed | 0.5377  | 0.756 | 112.5 | -0.959   | 2.035    |
| Athletics               | Girls-Mixed | 0.4552  | 0.753 | 111.7 | -1.037   | 1.947    |
| Fielding/striking games | Girls-Mixed | -0.2247 | 0.508 | 120.8 | -1.23    | 0.781    |
| Various                 | Girls-Mixed | -0.4897 | 0.685 | 87.8  | -1.851   | 0.871    |
| Net/wall/racket games   | Girls-Mixed | -0.4505 | 0.548 | 125.2 | -1.536   | 0.635    |
| Invasion games          | Girls-Mixed | -0.5778 | 1.033 | 108.2 | -2.625   | 1.47     |
| Athletics-Field         | Girls-Mixed | nonEst  | NA    | NA    | NA       | NA       |
