# Supplementary material for: Exploring activity levels in physical education lessons in the UK: a cross-sectional examination of activity types and fitness levels
Source: HighWire-hosted journal article supplement (doi:10.1136/bmjsem-2020-000924), 2021-03-01
Supplement: bmjsem-2020-000924supp013_data_supplement.pdf [file bmjsem-2020-000924supp013_data_supplement.pdf]

## Exploring activity levels in physical education lessons in the UK: A cross-sectional examination of activity types and fitness levels

### SUPPLEMENTARY FILE 13: Lesson Location

When considering factors affecting PA, a recent systematic review[1] identified modifiable variables that were consistently associated with levels of MVPA in PE including the class sex, the type of PE activities and content, **lesson location (outdoors)**, beliefs and values of students, and enjoyment of exercise.

### RESULTS

**Table:** Pupil average time (%) in PE lessons split by PA domain, for lesson location, at the A) Lesson-level and B) Pupil-level

| % of 1hr Lesson (SD) | A) Lesson-level |                  |               |                 | B) Pupil-level   |                   |                 |                  |
|----------------------|-----------------|------------------|---------------|-----------------|------------------|-------------------|-----------------|------------------|
|                      | Indoors (n=49)  | Outdoors (n=177) | In/Out (n=23) | Overall (n=249) | Indoors (n=1565) | Outdoors (n=6415) | In/Out (n=1503) | Overall (n=9483) |
| <b>PA Domain</b>     |                 |                  |               |                 |                  |                   |                 |                  |
| SPA                  | 44.5 (14.3)     | 43.0 (12.2)      | 44.5 (13.1)   | 44.3 (8.93)     | 47.6 (15.6)      | 43.7 (12.8)       | 42.6 (12.2)     | 44.2 (13.3)      |
| LPA                  | 32.2 (7.82)     | 32.9 (7.23)      | 31.4 (7.76)   | 32.2 (4.43)     | 28.9 (8.53)      | 32.5 (7.35)       | 33.2 (7.33)     | 32.0 (7.68)      |
| MPA                  | 16.6 (6.72)     | 17.0 (6.07)      | 16.6 (6.49)   | 16.7 (4.28)     | 16.3 (7.64)      | 16.6 (6.23)       | 17.4 (6.07)     | 16.7 (6.47)      |
| VPA                  | 6.68 (4.56)     | 7.12 (4.09)      | 7.44 (4.54)   | 7.00 (2.98)     | 7.20 (5.26)      | 7.21 (4.33)       | 6.79 (4.06)     | 7.14 (4.46)      |
| MVPA                 | 23.3 (10.1)     | 24.1 (8.83)      | 24.1 (9.24)   | 23.7 (6.27)     | 23.5 (10.9)      | 23.8 (9.13)       | 24.2 (8.93)     | 23.8 (9.42)      |

For MVPA and VPA, similar PA levels were recorded for lesson locations (23.9% v 23.6%, and 7.0% vs 7.1% for indoor vs outdoor lessons respectively).

### Multi-level Models of Physical Activity Levels during PE

The following tables summarise associations between PA levels and predictor variables. The interaction of ‘**activity group by lesson location**’ was examined. As summarized (Table 1 | Model estimates - SPA), outdoor lessons were less sedentary than indoor lessons. For MVPA, no significant differences were observed for the interaction (Table 1 | Model estimates - MVPA). Post-hoc analysis (Table 4 - VPA) showed that showed outdoor track athletics and invasion games were more vigorously active than indoor fielding/striking games and outdoor field athletics. For SPA (Table 4 - SPA), regardless of location, fielding/striking games and field athletics were more sedentary than outdoor invasion games, and net/wall/racket games and track athletics respectively. Outdoor field athletics was more sedentary than indoor fitness, and outdoor fielding/striking games.

## Exploring activity levels in physical education lessons in the UK: A cross-sectional examination of activity types and fitness levels

**Table 1:** Summary of PA in PE model estimates, CIs and p-values

| Model estimate <sup>a</sup>                           | VPA      |                | MVPA     |                | SPA      |                |
|-------------------------------------------------------|----------|----------------|----------|----------------|----------|----------------|
|                                                       | B        | 95% CI         | B        | 95% CI         | B        | 95% CI         |
| (Intercept)                                           | 0.18     | -0.48 to 0.84  | 0.20     | -0.41 to 0.81  | 0.04     | -0.54 to 0.62  |
| Net/wall/racket games <sup>b</sup>                    | -0.43    | -0.93 to 0.07  | -0.11    | -0.60 to 0.38  | -0.16    | -0.65 to 0.32  |
| Fielding/striking games <sup>b</sup>                  | -0.86*** | -1.32 to -0.40 | -0.80*** | -1.24 to -0.36 | 0.39     | -0.05 to 0.82  |
| Athletics                                             | -0.06    | -0.44 to 0.32  | -0.45*   | -0.81 to -0.08 | 0.63***  | 0.27 to 0.99   |
| Fitness <sup>b</sup>                                  | 0.24     | -0.19 to 0.66  | 0.18     | -0.23 to 0.59  | -0.31    | -0.72 to 0.09  |
| Adventure/Games <sup>b</sup>                          | -1.05**  | -1.87 to -0.24 | -1.21**  | -2.00 to -0.42 | 0.94*    | 0.16 to 1.72   |
| Various                                               | -0.58    | -1.28 to 0.12  | -0.75*   | -1.42 to -0.09 | 0.76*    | 0.11 to 1.42   |
| Athletics-Field <sup>b</sup>                          | -0.18    | -0.83 to 0.47  | -0.76*   | -1.38 to -0.14 | 0.78*    | 0.17 to 1.39   |
| Athletics-Track <sup>b</sup>                          | 0.17     | -0.21 to 0.55  | -0.12    | -0.49 to 0.25  | 0.28     | -0.08 to 0.64  |
| Location-Outdoors <sup>c</sup>                        | 0.35     | -0.03 to 0.72  | 0.33     | -0.03 to 0.70  | -0.71*** | -1.07 to -0.35 |
| ActivityGroupNet/wall/racket games:LocationOutdoors   | -0.00    | -0.60 to 0.60  | -0.19    | -0.77 to 0.40  | 0.43     | -0.15 – 1.00   |
| ActivityGroupFielding/striking games:LocationOutdoors | 0.47     | -0.01 to 0.95  | 0.30     | -0.17 to 0.77  | 0.19     | -0.28 – 0.65   |
| ActivityGroupFitness:LocationOutdoors                 | -0.41    | -1.55 to 0.73  | -0.26    | -1.35 to 0.84  | 0.32     | -0.75 – 1.39   |
| ActivityGroupAdventure/Games:LocationOutdoors         | 0.94     | -0.16 to 2.04  | 0.70     | -0.36 to 1.76  | -0.50    | -1.55 – 0.54   |
| ActivityGroupVarious:LocationOutdoors                 | 0.18     | -0.55 to 0.92  | 0.27     | -0.43 to 0.98  | -0.16    | -0.85 – 0.52   |
| ActivityGroupAthletics-Field:LocationOutdoors         | -0.91*   | -1.63 to -0.20 | -0.58    | -1.28 to 0.11  | 0.77*    | 0.08 – 1.45    |

<sup>a</sup> Fully-adjusted model including lesson length, lesson type, and school effects; SPA/MVPA are orderNorm transformed; VPA are Yeo-Johnson transformed.

<sup>b</sup> Reference category: Invasion games; <sup>c</sup> Reference category: Indoors

<sup>d</sup> Reference category: ActivityGroupInvasion games:LocationIndoors

\*\*\* p<.001; \*\* p<.0125; \* p<.05

Significant differences observed for ActivityGroup\*LessonType for VPA and SPA; post-hoc analysis conducted.

**Notes**

*Model (ActivityGroup\*Location of PE lesson)* This model was developed to explore the interaction of activity and PE Lesson location.

Exploring activity levels in physical education lessons in the UK: A cross-sectional examination of activity types and fitness levels

**Tables:** summary of the fixed effect interactions (LS Means) for Model 4, for VPA, MVPA & SPA

Table 2 | Model | Activity Group\*Lesson Location | VPA | lsmeans

| Activity Group          | Location | lsmean  | SE    | df  | lower.CL | upper.CL |
|-------------------------|----------|---------|-------|-----|----------|----------|
| Invasion games          | Indoors  | -0.1064 | 0.221 | 257 | -0.5413  | 0.3285   |
| Net/wall/racket games   | Indoors  | -0.5327 | 0.218 | 403 | -0.962   | -0.1035  |
| Fielding/striking games | Indoors  | -0.9593 | 0.188 | 294 | -1.3296  | -0.5891  |
| Athletics               | Indoors  | nonEst  | NA    | NA  | NA       | NA       |
| Fitness                 | Indoors  | 0.1325  | 0.192 | 243 | -0.2452  | 0.5101   |
| Adventure/Games         | Indoors  | -1.1535 | 0.409 | 253 | -1.9585  | -0.3485  |
| Various                 | Indoors  | -0.679  | 0.327 | 248 | -1.3224  | -0.0355  |
| Athletics-Field         | Indoors  | -0.2813 | 0.31  | 269 | -0.8922  | 0.3296   |
| Athletics-Track         | Indoors  | nonEst  | NA    | NA  | NA       | NA       |
| Invasion games          | Outdoors | 0.2442  | 0.165 | 206 | -0.0814  | 0.5699   |
| Net/wall/racket games   | Outdoors | -0.1902 | 0.201 | 320 | -0.5848  | 0.2044   |
| Fielding/striking games | Outdoors | -0.1414 | 0.136 | 145 | -0.4108  | 0.128    |
| Athletics               | Outdoors | 0.1887  | 0.196 | 258 | -0.1976  | 0.5749   |
| Fitness                 | Outdoors | 0.0785  | 0.582 | 242 | -1.0686  | 1.2257   |
| Adventure/Games         | Outdoors | 0.1355  | 0.397 | 222 | -0.6467  | 0.9178   |
| Various                 | Outdoors | -0.1457 | 0.168 | 165 | -0.4776  | 0.1861   |
| Athletics-Field         | Outdoors | -0.8465 | 0.247 | 225 | -1.3323  | -0.3606  |
| Athletics-Track         | Outdoors | 0.4176  | 0.196 | 333 | 0.0313   | 0.8039   |

Model 4 | Activity Group\*Lesson Location | MVPA

The interaction effect was not significant.

Table 3 | Model | Activity Group\*Lesson Location | SPA | lsmeans

| Activity Group          | Location | lsmean   | SE    | df  | lower.CL | upper.CL |
|-------------------------|----------|----------|-------|-----|----------|----------|
| Invasion games          | Indoors  | 0.14284  | 0.206 | 257 | -0.262   | 0.548    |
| Net/wall/racket games   | Indoors  | -0.02937 | 0.204 | 398 | -0.431   | 0.372    |
| Fielding/striking games | Indoors  | 0.52101  | 0.173 | 301 | 0.181    | 0.8613   |
| Athletics               | Indoors  | nonEst   | NA    | NA  | NA       | NA       |
| Fitness                 | Indoors  | -0.17726 | 0.175 | 245 | -0.523   | 0.1681   |
| Adventure/Games         | Indoors  | 1.07449  | 0.388 | 261 | 0.311    | 1.838    |
| Various                 | Indoors  | 0.89613  | 0.3   | 239 | 0.305    | 1.4877   |
| Athletics-Field         | Indoors  | 0.91557  | 0.292 | 275 | 0.341    | 1.4898   |
| Athletics-Track         | Indoors  | nonEst   | NA    | NA  | NA       | NA       |
| Invasion games          | Outdoors | -0.56981 | 0.149 | 202 | -0.863   | -0.2766  |
| Net/wall/racket games   | Outdoors | -0.31401 | 0.187 | 321 | -0.682   | 0.0535   |
| Fielding/striking games | Outdoors | 0.00343  | 0.12  | 142 | -0.234   | 0.2407   |
| Athletics               | Outdoors | 0.05543  | 0.181 | 259 | -0.301   | 0.4121   |
| Fitness                 | Outdoors | -0.56815 | 0.549 | 248 | -1.649   | 0.5131   |
| Adventure/Games         | Outdoors | -0.13935 | 0.378 | 230 | -0.885   | 0.6059   |
| Various                 | Outdoors | 0.02164  | 0.15  | 164 | -0.274   | 0.3169   |
| Athletics-Field         | Outdoors | 0.97543  | 0.224 | 210 | 0.534    | 1.4168   |
| Athletics-Track         | Outdoors | -0.28991 | 0.182 | 345 | -0.647   | 0.0675   |

## Exploring activity levels in physical education lessons in the UK: A cross-sectional examination of activity types and fitness levels

**Table 4:** Post-hoc LS Means, Contrasts and significances, and SPA, VPA and MVPA

| Model: Activity Group*Location Interaction Effect |                             |         |                             | VPA       | SPA       | MVPA |
|---------------------------------------------------|-----------------------------|---------|-----------------------------|-----------|-----------|------|
|                                                   |                             |         |                             | Yes       | Yes       | No   |
| Indoor                                            | Invasion Games (-)          | Outdoor | Invasion Games (+)          |           | 0.707*    |      |
| Indoor                                            | Invasion Games (-)          | Outdoor | Net/wall/racket games (+)   |           |           |      |
| Indoor                                            | Net/wall/racket games (+)   | Outdoor | Athletics-Field (-)         |           | -1.005*   |      |
| Indoor                                            | Net/wall/racket games (-)   | Outdoor | Athletics-Track (+)         | -0.949**  |           |      |
| Indoor                                            | Fielding/striking games (-) | Outdoor | Invasion Games (+)          | -1.208*** | 1.094***  |      |
| Indoor                                            | Fielding/striking games (-) | Outdoor | Net/wall/racket games (+)   |           | 0.832*    |      |
| Indoor                                            | Fielding/striking games (-) | Outdoor | Fielding/striking games (+) | -0.820*** |           |      |
| Indoor                                            | Fielding/striking games (-) | Outdoor | Athletics (+)               | -1.150*** |           |      |
| Indoor                                            | Fielding/striking games (-) | Outdoor | Athletics-Track (+)         | -1.377*** | 0.811***  |      |
| Indoor                                            | Fielding/striking games (-) | Outdoor | Various (+)                 | -0.811*   |           |      |
| Indoor                                            | Athletics-Field (-)         | Outdoor | Invasion Games (+)          |           | 1.488***  |      |
| Indoor                                            | Athletics-Field (-)         | Outdoor | Net/wall/racket games (+)   |           | 1.226*    |      |
| Indoor                                            | Athletics-Field (-)         | Outdoor | Fielding/striking games (+) |           |           |      |
| Indoor                                            | Athletics-Field (-)         | Outdoor | Athletics-Track (+)         |           | 1.205*    |      |
| Indoor                                            | Fitness (+)                 | Outdoor | Athletics-Field (-)         |           | -1.156**  |      |
| Indoor                                            | Adventure/Games (-)         | Outdoor | Invasion Games (+)          |           | 1.645**   |      |
| Indoor                                            | Adventure/Games (-)         | Outdoor | Athletics-Track (+)         | -1.570*   |           |      |
| Indoor                                            | Various (-)                 | Outdoor | Invasion Games (+)          |           | 1.470**   |      |
| Indoor                                            | Various (-)                 | Outdoor | Net/wall/racket games (+)   |           |           |      |
| Indoor                                            | Various (-)                 | Outdoor | Fielding/striking games (+) |           |           |      |
| Indoor                                            | Various (-)                 | Outdoor | Athletics-Track (+)         |           |           |      |
| Indoor                                            | Various (-)                 | Outdoor | Various (+)                 |           |           |      |
| Outdoor                                           | Invasion Games (+)          | Outdoor | Fielding/striking games (-) |           | -0.572**  |      |
| Outdoor                                           | Invasion Games (+)          | Outdoor | Athletics-Field (-)         | 1.094**   | -1.548*** |      |
| Outdoor                                           | Net/wall/racket games (+)   | Outdoor | Athletics-Field (-)         |           | -1.286*** |      |
| Outdoor                                           | Fielding/striking games (+) | Outdoor | Athletics-Field (-)         |           | -0.974**  |      |
| Outdoor                                           | Athletics (+)               | Outdoor | Athletics-Field (-)         | 1.037*    |           |      |
| Outdoor                                           | Athletics-Field (-)         | Outdoor | Athletics-Track (+)         | -1.263*** | 1.265***  |      |
| Outdoor                                           | Various (+)                 | Outdoor | Athletics-Field (-)         |           | -0.948*   |      |

### Notes

- The direction of the effect is indicated by a (+) for 'more active', and a (-) for 'less active'.
- \*\*\* p<.001; \*\* p<.0125; \* p<.05. Values that are inferior to 0.0125 are highlighted in red.

## DISCUSSION

In general, we found outdoor lessons to be more vigorously active, and significantly less sedentary, than indoor lessons, apart from outdoor field athletics which was more sedentary than indoor fitness and indoor net/wall/racket games. Previous studies suggest that lesson location influences the intensity of PE lessons[2, 3] with a greater proportion of MVPA and VPA in outdoors compared to indoor classes, and less time spent doing SPA.

## REFERENCES

1. Zhou Y, Wang L. Correlates of Physical Activity of Students in Secondary School Physical Education: A Systematic Review of Literature. *Biomed Res Int*. 2019;2019:1-12.
2. Chow BC, McKenzie TL, Louie, L. Physical Activity and Environmental Influences during Secondary School Physical Education. *J Teach Phys Educ*. 2009;28:21-37.
3. McKenzie T, Catellier D, Conway T, et al. Girls' activity levels and lesson contexts in middle school PE: TAAG baseline. *Med Sci Sports Exerc*. 2006;38:1229-35.
