# Supplementary material for: Exploring activity levels in physical education lessons in the UK: a cross-sectional examination of activity types and fitness levels
Source: BMJ Open Sport Exerc Med. 2021 Mar 9;7(1):e000924. doi: 10.1136/bmjsem-2020-000924 (PMC7944978; doi:10.1136/bmjsem-2020-000924)
Supplement: Supplementary data [file bmjsem-2020-000924supp012.pdf]

# Exploring activity levels in physical education lessons in the UK: A cross-sectional examination of activity types and fitness levels

## SUPPLEMENTARY FILE 12: Post-hoc LSMeans tables

**Tables:** Post-hoc LS Means, Contrasts and significances for Model 2 & 3, and SPA, VPA and MVPA

| Model 2: Activity Group Main Effect                    |                             |       |                             | VPA       | SPA       | MVPA      |
|--------------------------------------------------------|-----------------------------|-------|-----------------------------|-----------|-----------|-----------|
|                                                        |                             |       |                             | Yes       | Yes       | Yes       |
|                                                        | Invasion Games (+)          |       | Fielding/striking games (-) | 0.492**   | -0.538*** | 0.554***  |
|                                                        | Invasion Games (+)          |       | Athletics-Field (-)         | 0.808*    | -1.339*** | 1.168***  |
|                                                        | Invasion Games (+)          |       | Various (-)                 |           | -0.548*   |           |
|                                                        | Net/wall/racket games(+)    |       | Fielding/striking games (-) |           | -0.442*   |           |
|                                                        | Net/wall/racket games (+)   |       | Athletics-Field (-)         |           | -1.241*** | 1.003***  |
|                                                        | Net/wall/racket games (-)   |       | Athletics-Track (+)         | -0.754**  |           |           |
|                                                        | Net/wall/racket games (-)   |       | Fitness (+)                 | -0.663*   |           |           |
|                                                        | Fielding/striking games (+) |       | Athletics-Field (-)         |           | -0.800**  |           |
|                                                        | Fielding/striking games (-) |       | Athletics-Track (+)         | -0.868*** |           | -0.574*** |
|                                                        | Fielding/striking games (-) |       | Fitness (+)                 | -0.777*** | 0.720***  | -0.778*** |
|                                                        | Athletics (-)               |       | Fitness (+)                 |           | 0.764*    |           |
|                                                        | Athletics-Field (-)         |       | Athletics-Track (+)         | -1.185*** | 1.098***  | -1.188*** |
|                                                        | Fitness (+)                 |       | Athletics-Field (-)         | 1.094**   | -1.520*** | 1.391***  |
|                                                        | Fitness (+)                 |       | Adventure/Games (-)         |           |           | 1.031*    |
|                                                        | Various (+)                 |       | Various (-)                 | 0.684*    | -0.730**  | 0.695*    |
|                                                        | Various (+)                 |       | Athletics-Field (-)         |           | -0.790**  | 0.697*    |
|                                                        | Various (-)                 |       | Athletics-Track (+)         | -0.775**  |           |           |
| Model 3: Activity Group*Lesson Type Interaction Effect |                             |       |                             | Yes       | Yes       | Yes       |
| Mixed                                                  | Net/wall/racket games (-)   | Mixed | Fitness (+)                 | -1.542**  |           |           |
| Mixed                                                  | Fielding/striking games (-) | Mixed | Athletics-Track (+)         | -0.992*** |           | -0.636**  |
| Mixed                                                  | Fielding/striking games (-) | Mixed | Fitness (+)                 | -1.769*** |           |           |
| Mixed                                                  | Athletics-Field (-)         | Mixed | Athletics-Track (+)         | -1.286*   |           | -1.353**  |
| Mixed                                                  | Fitness (+)                 | Mixed | Athletics-Field (-)         | 2.063***  |           | 1.805**   |
| Mixed                                                  | Fitness (+)                 | Mixed | Various (-)                 | 1.510***  |           |           |
| Boys                                                   | Invasion Games (+)          | Boys  | Athletics-Field (-)         |           | -1.660*   |           |
| Boys                                                   | Fitness (+)                 | Boys  | Athletics-Field (-)         |           | -2.016**  | 1.810*    |
| Boys                                                   | Invasion Games (+)          | Mixed | Fielding/striking games (-) | 0.853**   |           |           |
| Boys                                                   | Fitness (+)                 | Mixed | Fielding/striking games (-) | 0.984*    | -1.007*   | 1.022**   |
| Boys                                                   | Invasion Games (+)          | Mixed | Athletics-Field (-)         |           | -1.491**  | 1.348*    |
| Boys                                                   | Fitness (+)                 | Mixed | Athletics-Field (-)         |           | -1.846*** | 1.739***  |
| Boys                                                   | Net/wall/racket games (-)   | Mixed | Fitness (+)                 | -1.494*   |           |           |
| Boys                                                   | Fielding/striking games (-) | Mixed | Fitness (+)                 | -1.256*   |           |           |
| Boys                                                   | Athletics-Field (-)         | Mixed | Fitness (+)                 | -2.252**  |           | -1.876*   |
| Boys                                                   | Invasion Games (+)          | Mixed | Various (-)                 |           | -0.743*   |           |
| Boys                                                   | Fitness (+)                 | Mixed | Various (-)                 |           | -1.099**  |           |
| Girls                                                  | Net/wall/racket games (+)   | Girls | Fielding/striking games (-) |           |           |           |
| Girls                                                  | Net/wall/racket games (+)   | Girls | Athletics-Field (-)         |           |           |           |
| Girls                                                  | Fitness (-)                 | Girls | Athletics-Field (+)         |           |           |           |
| Girls                                                  | Net/wall/racket games (+)   | Mixed | Athletics-Field (-)         |           |           |           |
| Girls                                                  | Fitness (-)                 | Mixed | Fitness (+)                 | -1.732*   |           |           |
| Girls                                                  | Fielding/striking games (-) | Boys  | Fitness (+)                 |           |           |           |
| Girls                                                  | Athletics-Field (-)         | Boys  | Fitness (+)                 |           | 1.622*    |           |

### Notes

- The direction of the effect is indicated by a (+) for 'more active', and a (-) for 'less active'.
- \*\*\* p<.001; \*\* p<.0125; \* p<.05. Values that are inferior to 0.0125 are highlighted in red.
